# Supplementary material for: Deciphering Microenvironment of NSCLC based on CD8+ TIL Density and PD-1/PD-L1 Expression
Source: PubMed Central journal article supplement — J Cancer. 2019 Jan 1;10(1):211–22. doi: 10.7150/jca.26444 (PMC6329863; doi:10.7150/jca.26444), 2019-01-01
Supplement: jcav10p0211s1.pdf [file jcav10p0211s1.pdf]

# Supplemental material

Table S1. Basic information of gene sets included in the study.

| Gene sets                             | Gene components                                                                                                                                                                                                                                                                                                                                                                                                                                                                                                                                                          |
|---------------------------------------|--------------------------------------------------------------------------------------------------------------------------------------------------------------------------------------------------------------------------------------------------------------------------------------------------------------------------------------------------------------------------------------------------------------------------------------------------------------------------------------------------------------------------------------------------------------------------|
| SCCup                                 | CDCA5, DSC3, DSG3, EPT1, KRT14, KRT5, OSGEP, PARD3B, PSMA8, PVRL1, SFN, SLC2A1, TOP2A, TPX2                                                                                                                                                                                                                                                                                                                                                                                                                                                                              |
| SCCdown                               | ABCA8, ADAMTS8, ADAMTSL3, ADARB1, AGER, AKAP2, CAV1, NR2F1, PGM5, PHACTR2, RASL12, SRCRB4D, ST6GALNAC5, VWF                                                                                                                                                                                                                                                                                                                                                                                                                                                              |
| maleaffy                              | USP9Y, ZFY, CYorf14, EIF1AY, CYorf15B, DDX3Y, JARID1D, UTY, CYorf15A, PRKY, CD24L4                                                                                                                                                                                                                                                                                                                                                                                                                                                                                       |
| femaleaffy                            | XIST, AZI2, EREG, GPM6B                                                                                                                                                                                                                                                                                                                                                                                                                                                                                                                                                  |
| KEGG_MISMATCH_REPAIR                  | MLH3, POLD1, MLH1, POLD2, RFC1, MSH2, RFC3, RFC2, MSH3, POLD4, PMS2, RFC4, LIG1, RFC5, RPA1, MSH6, RPA3, POLD3, RPA2, PCNA, SSBP1, RPA4, EXO1                                                                                                                                                                                                                                                                                                                                                                                                                            |
| MITOSIS                               | KIF22, KIF25, NBN, KNTC1, PKMYT1, TTK, AURKA, CDC16, TTN, TGFB1, KIF2C, TRIAP1, DDX11, CDKN2B, PCBP4, TARDBP, PRMT5, TGFA, CCNA2, CDCA5, ZW10, KIF11, ANAPC5, RAN, KIF15, RINT1, ANAPC4, TPX2, NUSAP1, ESPL1, UBE2C, DCTN3, DCTN2, CHMP1A, MAD2L1, EREG, ZWINT, BUB1B, CLIP1, AKAP8, MAD2L2, CHFR, NEK6, RAD17, PPP5C, PAM, NEK2, PML, CETN1, ANLN, ANAPC10, ANAPC11, BRSK1, RCC1, PIN1, NUMA1, NCAPH, NPM2, BUB1, PBRM1, CDK13, EGF, GML, CD28, SSSCA1, PDS5B, CDC23, CENPE, NDC80, BIRC5, SUGT1, CDC25C, CDC27, SMC3, ATM, CDC25B, SMC4, NOLC1, PLK1, EPGN, SMC1A, CIT |
| GO_INNER_CELL_MASS_CELL_PROLIFERATION | BRCA2, GINS1, GINS4, NCAPG2, NDEL1, PALB2, PRPF19, SALL4, SBDS, TAF8, ZNF259                                                                                                                                                                                                                                                                                                                                                                                                                                                                                             |
| INTERFERON_GAMMA_PRODUCTION           | IL27, CEBPG, IL18, CD276, TLR3, INHA, FOXP3, TLR7, TLR8, TLR9, INHBA, IL12A, IL12B, EBI3                                                                                                                                                                                                                                                                                                                                                                                                                                                                                 |
| CD8+ T                                | TRBC1, TRBV19, TRBV5-4, TRBV21-1, CCL5, CD3D, TRBV3-1, LOC647353, LCK, CD8A, IL7R, PRKCH, KLRK1                                                                                                                                                                                                                                                                                                                                                                                                                                                                          |

Table S2. Clinicopathological information of included cases

|                                          | Subgroups        | No.      |
|------------------------------------------|------------------|----------|
| Age                                      | Median(sd)       | 67 (9.4) |
|                                          | <=65 years       | 427      |
|                                          | >65 years        | 558      |
| Gender                                   | NA               | 28       |
|                                          | Male             | 607      |
| Histology                                | Female           | 406      |
|                                          | ADC              | 513      |
| TNM                                      | SCC              | 500      |
|                                          | I                | 517      |
|                                          | II               | 283      |
|                                          | III              | 168      |
|                                          | IV               | 33       |
| EGFR                                     | NA               | 12       |
|                                          | Driver mutant    | 69       |
|                                          | Wild type        | 886      |
| KRAS                                     | Passenger mutant | 20       |
|                                          | Driver mutant    | 171      |
|                                          | Wild type        | 801      |
| Smoking                                  | Passenger mutant | 3        |
|                                          | Smokers          | 774      |
|                                          | Non-smokers      | 239      |
| Median follow-up time (months)<br>status | Unknown          | 3        |
|                                          | Alive            | 28.633   |
|                                          | Dead             | 653      |
|                                          | NA               | 340      |
|                                          | NA               | 20       |

Abbreviations : ADC, adenocarcinoma; SCC, squamous cell carcinoma; EGFR, epidermal growth factor receptor; KRAS, Kirsten rat sarcoma viral oncogene; sd, standard deviation; NA, not available.

Table S3. Clinicopathological information of included cases

|                                          | Subgroups   | No.          |
|------------------------------------------|-------------|--------------|
| Age                                      | Median(sd)  | 64.56( 10.0) |
|                                          | <=65 years  | 139          |
|                                          | >65 years   | 136          |
|                                          | NA          | 0            |
| Gender                                   | Male        | 148          |
|                                          | Female      | 127          |
|                                          | NA          | 0            |
| Histology                                | ADC         | 183          |
|                                          | SCC         | 80           |
|                                          | others      | 12           |
|                                          | NA          | 0            |
| TNM                                      | I           | 133          |
|                                          | II          | 50           |
|                                          | III         | 86           |
|                                          | IV          | 6            |
|                                          | NA          | 0            |
| Smoking                                  | Smokers     | 272          |
|                                          | Non-smokers | 3            |
|                                          | Unknown     | 0            |
| Median follow-up time (months)<br>status |             | 36.2         |
|                                          | Alive       | 151          |
|                                          | Dead        | 124          |
|                                          | NA          | 0            |

Abbreviations : ADC, adenocarcinoma; SCC, squamous cell carcinoma; sd, standard deviation; NA, not available.

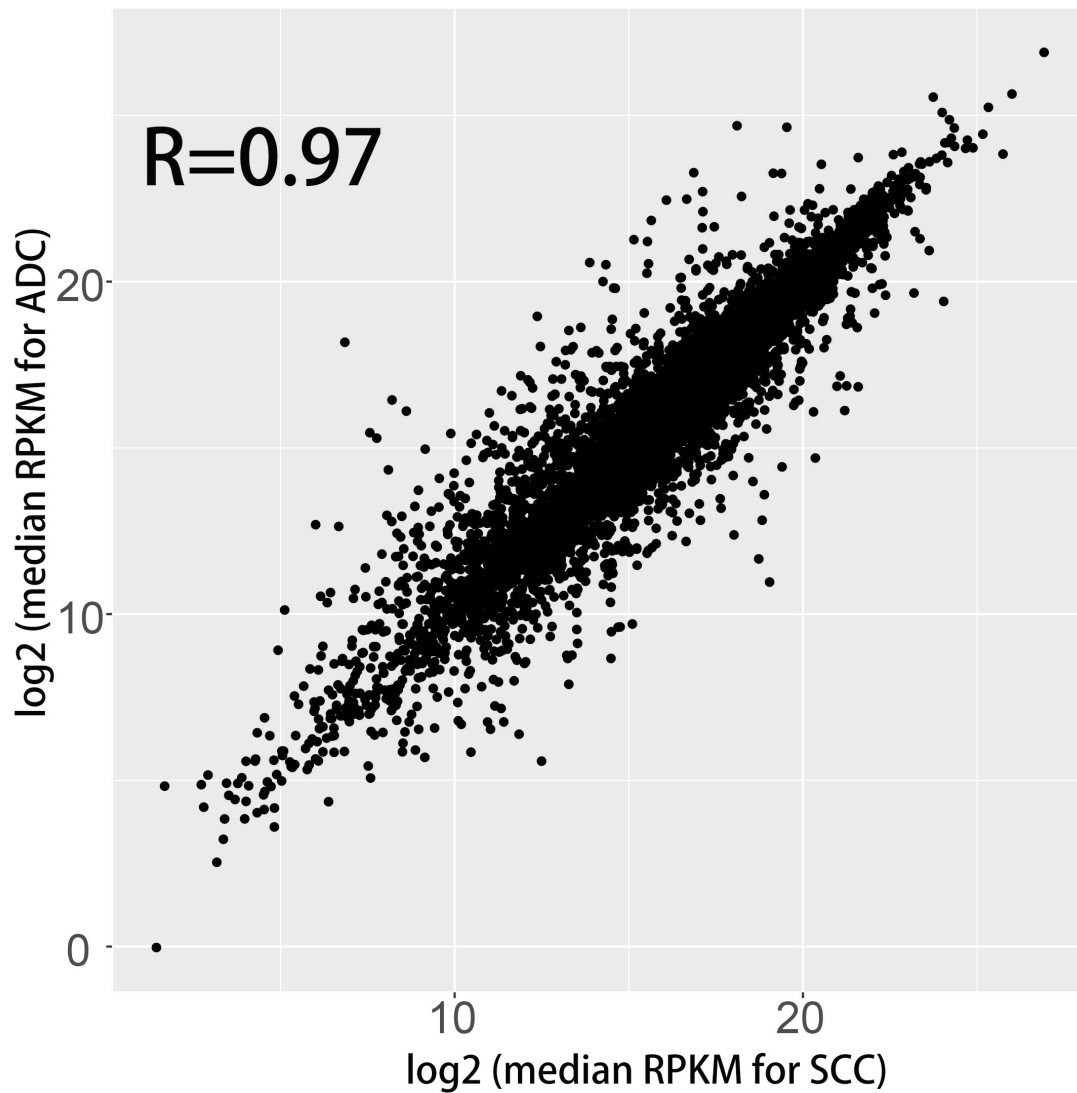

**Supplementary Figure 1. compatibility for merging LUAD and LUSC datasets.**

The median RPKM value of each of the 24991 gene symbol was computed for LUAD dataset and LUSC dataset respectively. Each spot on the scatterplot stands for a single gene, with x-axis value and y-axis stand for its log<sub>2</sub> transferred median RPKM value in LUSC and LUAD respectively. Correlation of the overall gene expression in the two datasets was computed through Pearson correlation, with the coefficient  $R=0.97$ , which indicates that the two datasets are homogeneous and can be merged for further analysis.

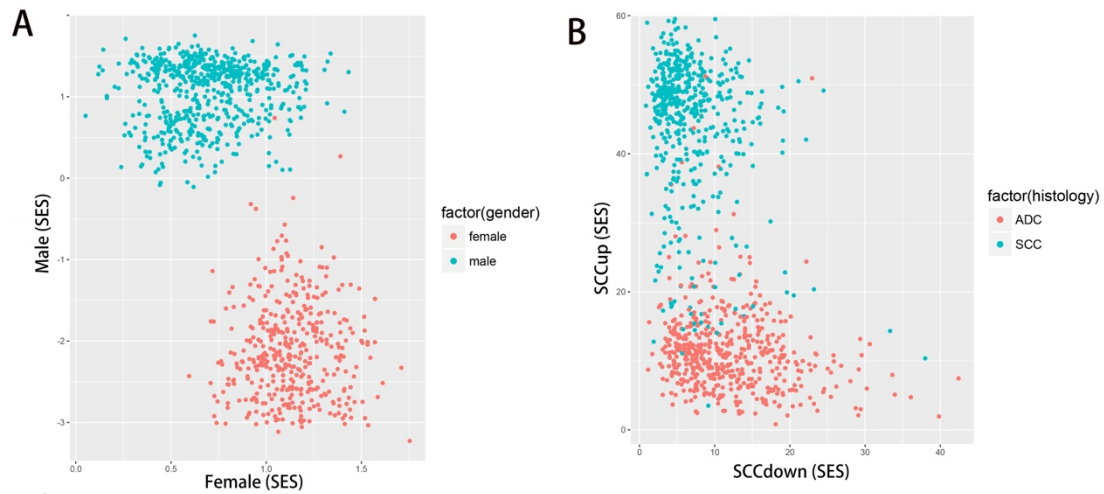

**Supplementary Figure 2. Validation of SES by distribution analysis.**

A Plots of SES for the female gene set vs male gene set (A) and SCC down expressing gene set vs SCC up expressing gene set (B) in annotated subtypes of NSCLC samples: female (red dots), male (blue dots) and ADC (red dots), SCC (blue dots).

Abbreviations: ADC, adenocarcinoma; SCC, squamous cell carcinoma.

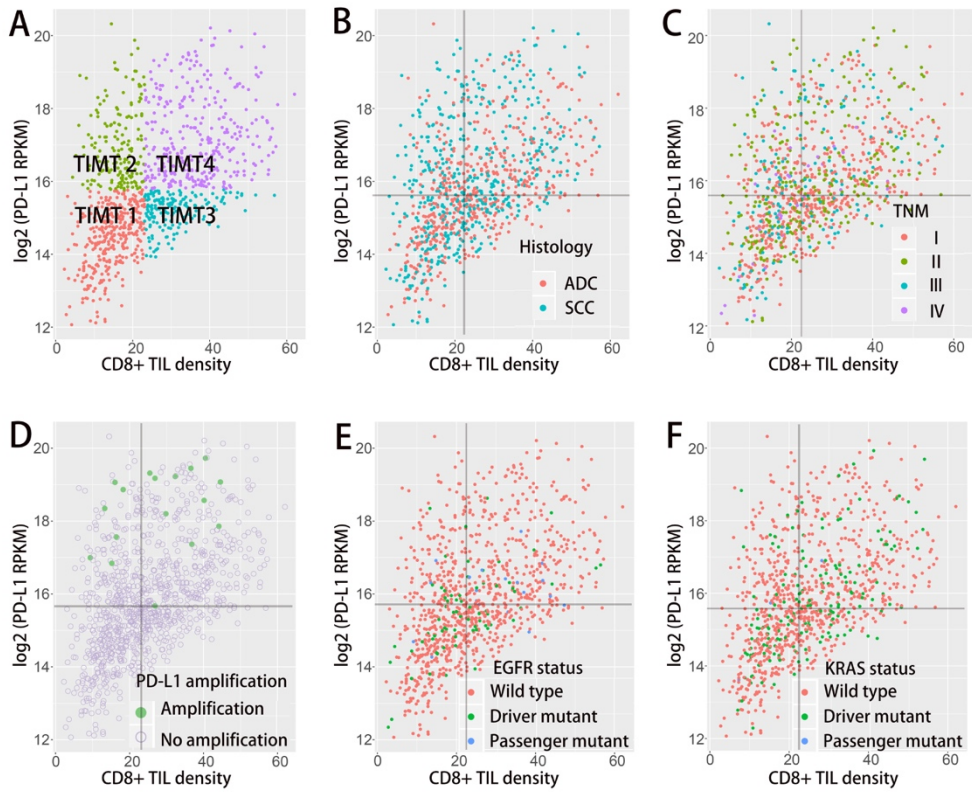

**Supplementary Figure 3. Distribution of PD-L1 and CD8+ TIL density expression in NSCLC subgroups.**

Tumor microenvironment immune type (TMITs) determined by median levels of PD-L1 expression and CD8+ TIL density.

Abbreviations: PD-1, programmed cell death ligand-1; ADC, adenocarcinoma; SCC, squamous cell carcinoma; EGFR, epidermal growth factor receptor; KRAS, Kirsten rat sarcoma viral oncogene; RPKM, reads per kilobase of transcript per million reads mapped.

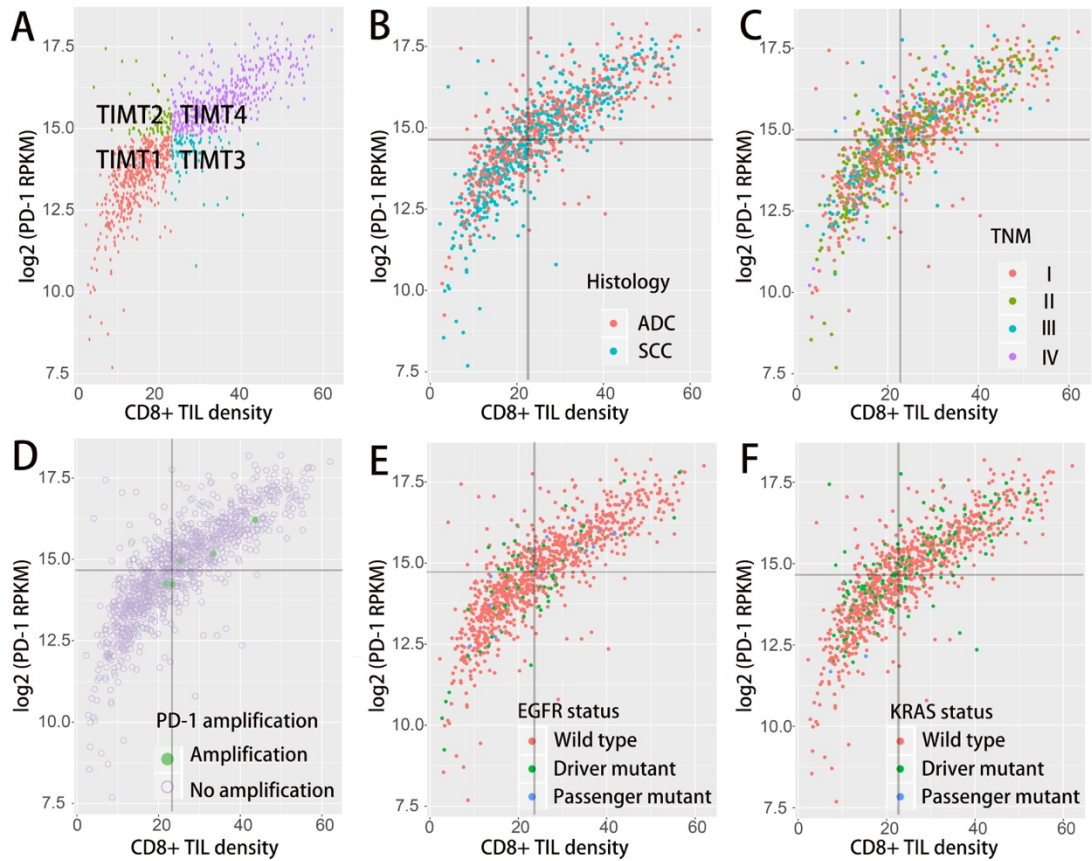

**Supplementary Figure 4. Distribution of PD-1 and CD8+ TIL density expression in NSCLC subgroups.**

Tumor microenvironment immune type (TMITs) determined by median levels of PD-L1 expression and CD8+ TIL density.

Abbreviations: PD-1, programmed cell death-1; ADC, adenocarcinoma; SCC, squamous cell carcinoma; EGFR, epidermal growth factor receptor; KRAS, Kirsten rat sarcoma viral oncogene; RPKM, reads per kilobase of transcript per million reads mapped.

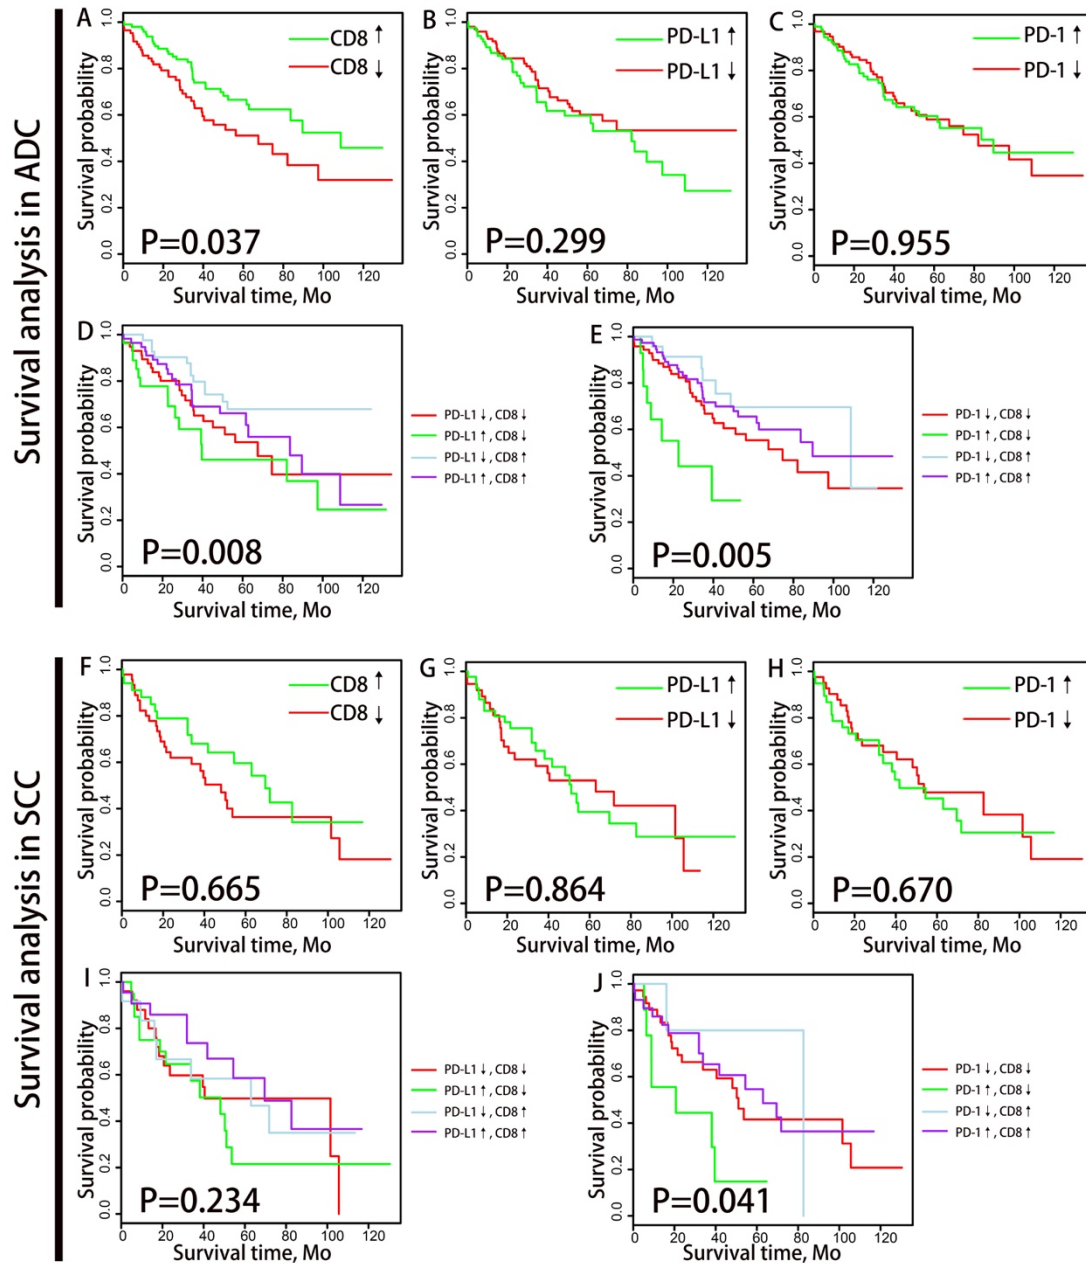

**Supplementary Figure 4. Survival analysis in validation cohort according to histologic subtypes.**

Survival analysis in validation cohort were performed for ADC (A-E) and SCC (F-J) respectively. Kaplan-Meier plots of overall survival according to CD8+ TILs density and PD-1/PD-L1 expression level are graphed (A-C, F-H). PD-1/PD-L1 $\downarrow$  and PD-1/PD-L1 $\uparrow$  refer to tumors with PD-1/PD-L1 mRNA expression value less or more than the median respectively. CD8 $\downarrow$  and CD8 $\uparrow$  refer to tumors with CD8+ TILs enrichment score more or less than the median respectively. Tumors were classified into four TIMTs based on the combination of CD8+ TIL and PD-1/PD-L1, with median values as cutoff points. Kaplan-Meier plots of overall survival according to TIMTs are graphed (D, E, I, J).
